# Supplementary material for: Rebaudioside A from Stevia rebaudiana stimulates GLP-1 release by enteroendocrine cells via bitter taste signalling pathways
Source: Royal Society of Chemistry journal article supplement (doi:10.1039/d3fo00818e), 2023-01-01
Supplement: d3fo00818e1.pdf [file d3fo00818e1.pdf]

## Supplementary material

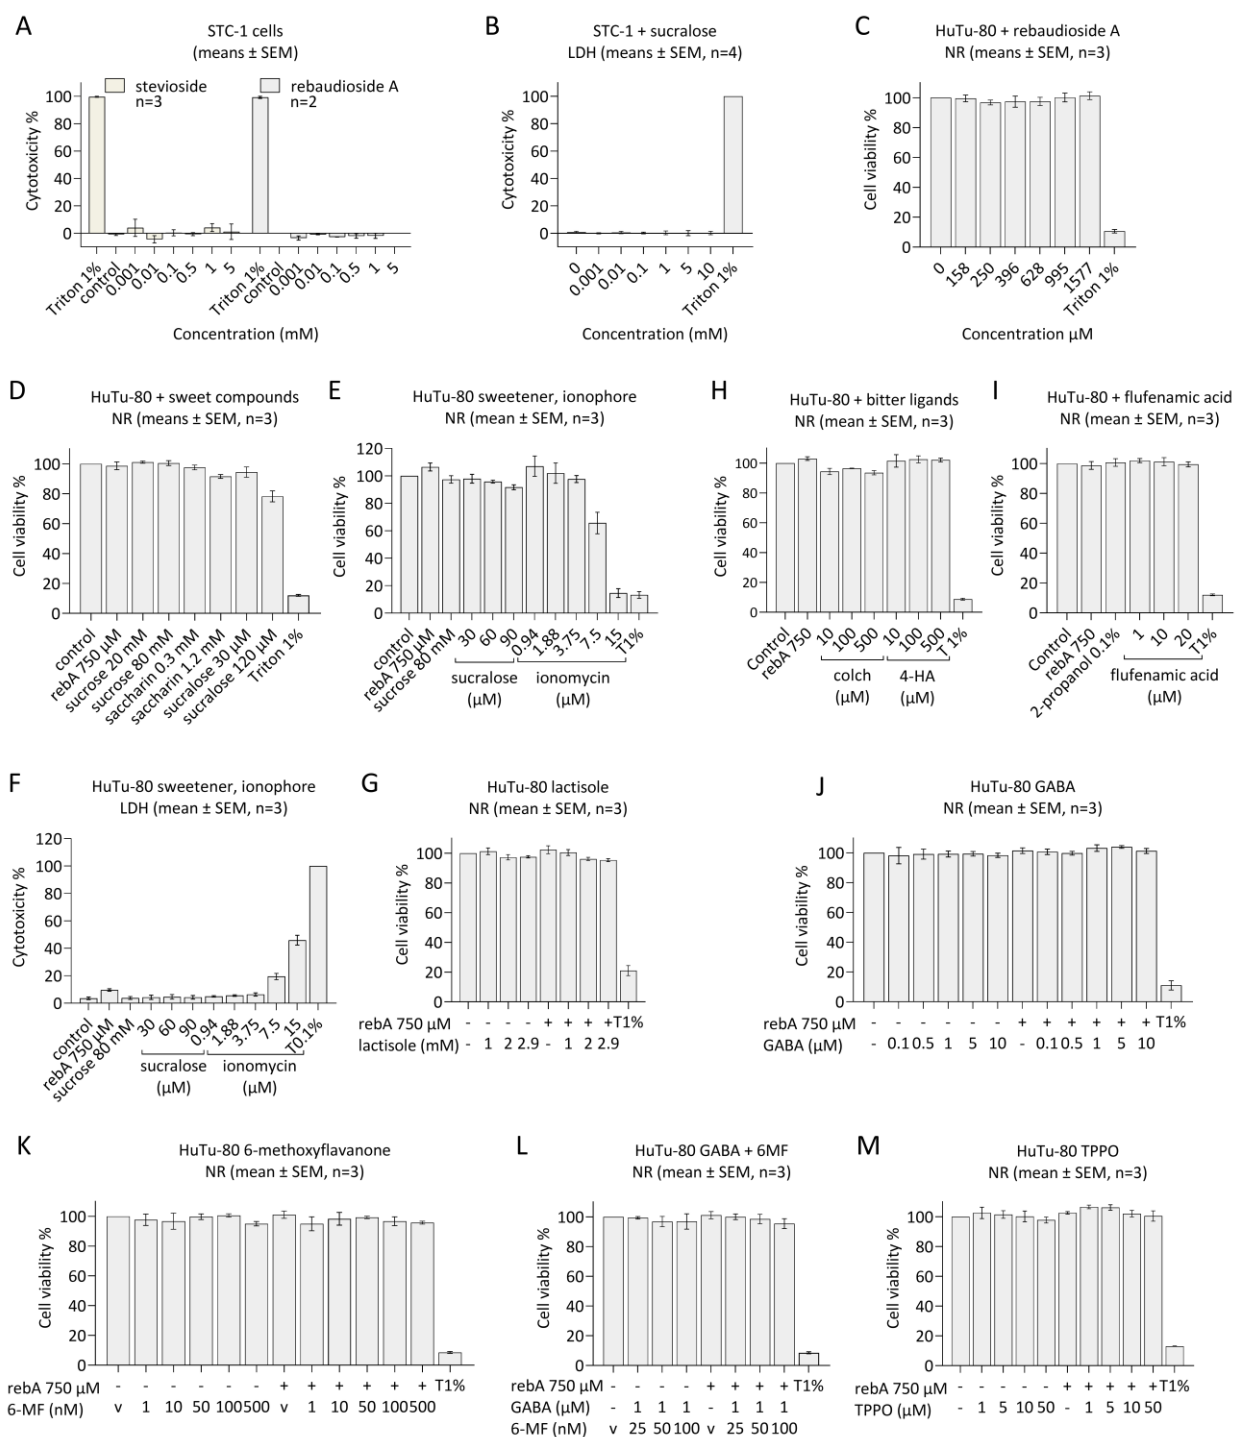

**Figure S1.** Cytotoxicity by neutral red test (NR) and/or lactate dehydrogenase test (LDH) tests. (A-B) Sweet compounds in STC-1 cells. (C) Curve of rebA in HuTu-80 cells. (D-F) Sweet compounds in HuTu-80 cells. (G) Sweet taste receptor blocker lactisole. (H-I) Bitter compounds in HuTu-80 cells. (J-L) Bitter taste receptor blockers. (M) TRPM5 blocker. OD values are expressed relatively to the control assay buffer (100%). Triton bars correspond to total cell-death. v: solvent vehicle.

**Table S1.** Statistics. Confidence intervals (CI) and *P*-values of every comparison.

| A. Gurmarin                                   |            |                     |         |                           |
|-----------------------------------------------|------------|---------------------|---------|---------------------------|
| Bonferroni's multiple comparisons test        | Mean Diff. | 95.00% CI of diff.  | Summary | Adjusted <i>P</i> Value   |
| rebA 1 mM vs. gurmarin 0.03 µg/ml + rebA 1 mM | -0.1409    | -2.833 to 2.551     | ns      | >0.9999                   |
| rebA 1 mM vs. gurmarin 0.1 µg/ml + rebA 1 mM  | -0.4927    | -3.185 to 2.200     | ns      | >0.9999                   |
| rebA 1 mM vs. gurmarin 0.3 µg/ml + rebA 1 mM  | -0.05482   | -2.747 to 2.637     | ns      | >0.9999                   |
| rebA 1 mM vs. gurmarin 3 µg/ml + rebA 1 mM    | -1.153     | -3.845 to 1.539     | ns      | >0.9999                   |
| B. MDL                                        |            |                     |         |                           |
| Bonferroni's multiple comparisons test        | Mean Diff. | 95.00% CI of diff.  | Summary | Adjusted <i>P</i> Value   |
| control vs. MDL 10 µM                         | 0.3427     | -0.4376 to 1.123    | ns      | 0.5229                    |
| rebA 1 mM vs. rebA 1 mM + MDL 10 µM           | 1.217      | 0.4368 to 1.997     | **      | 0.0053                    |
| C. Sweet compounds                            |            |                     |         |                           |
| Uncorrected Fisher's LSD                      | Mean Diff. | 95.00% CI of diff.  | Summary | Individual <i>P</i> Value |
| control vs. rebA 750 µM                       | -1.013     | -1.234 to -0.7931   | ****    | <0.0001                   |
| control vs. sucrose 20 mM                     | -0.01933   | -0.2395 to 0.2009   | ns      | 0.8515                    |
| control vs. sucrose 80 mM                     | -0.2897    | -0.5099 to -0.06946 | *       | 0.0142                    |
| control vs. saccharin 0.3 mM                  | -0.02267   | -0.2429 to 0.1975   | ns      | 0.8263                    |
| control vs. saccharin 1.2 mM                  | -0.006667  | -0.2269 to 0.2135   | ns      | 0.9485                    |
| D. Sweetener and calcium ionophore            |            |                     |         |                           |
| Uncorrected Fisher's LSD                      | Mean Diff. | 95.00% CI of diff.  | Summary | Individual <i>P</i> Value |
| control vs. rebA 750 µM                       | -2.328     | -2.916 to -1.740    | ****    | <0.0001                   |
| control vs. sucrose 80 mM                     | -0.6430    | -1.169 to -0.1170   | *       | 0.0195                    |
| control vs. sucralose 30 µM                   | -0.02200   | -0.5480 to 0.5040   | ns      | 0.9307                    |
| control vs. sucralose 60 µM                   | -0.5477    | -1.074 to -0.02170  | *       | 0.0422                    |
| control vs. sucralose 90 µM                   | -0.3770    | -0.9030 to 0.1490   | ns      | 0.1488                    |
| control vs. ionomycin 0.94 µM                 | -0.3813    | -0.9073 to 0.1446   | ns      | 0.1445                    |
| control vs. ionomycin 1.88 µM                 | -0.3643    | -0.8903 to 0.1616   | ns      | 0.1621                    |
| control vs. ionomycin 3.75 µM                 | -0.3837    | -0.9096 to 0.1423   | ns      | 0.1422                    |
| E. Lactisole                                  |            |                     |         |                           |
| Bonferroni's multiple comparisons test        | Mean Diff. | 95.00% CI of diff.  | Summary | Adjusted <i>P</i> Value   |
| control vs. lactisole 1 mM                    | -0.3900    | -14.63 to 13.85     | ns      | >0.9999                   |
| control vs. lactisole 2 mM                    | -2.907     | -17.15 to 11.33     | ns      | >0.9999                   |
| rebA 750 µM vs. lactisole 1 mM                | -7.740     | -21.98 to 6.501     | ns      | 0.5469                    |
| rebA 750 µM vs. lactisole 2 mM                | -16.98     | -31.22 to -2.742    | *       | 0.0175                    |
| F. Bitter compounds                           |            |                     |         |                           |
| Uncorrected Fisher's LSD                      | Mean Diff. | 95.00% CI of diff.  | Summary | Individual <i>P</i> Value |
| control vs. rebA 750 µM                       | -1.478     | -1.811 to -1.144    | ****    | <0.0001                   |
| control vs. colchicine 1 µM                   | -0.08979   | -0.4983 to 0.3187   | ns      | 0.6574                    |
| control vs. colchicine 10 µM                  | -0.06805   | -0.4766 to 0.3405   | ns      | 0.7366                    |
| control vs. colchicine 100 µM                 | -0.1446    | -0.5531 to 0.2640   | ns      | 0.4762                    |
| control vs. colchicine 500 µM                 | 0.02641    | -0.3821 to 0.4349   | ns      | 0.8961                    |
| control vs. 4-HA 1 µM                         | 0.3097     | -0.09878 to 0.7183  | ns      | 0.1323                    |
| control vs. 4-HA 10 µM                        | 0.1258     | -0.2828 to 0.5343   | ns      | 0.5351                    |
| control vs. 4-HA 100 µM                       | 0.1200     | -0.2886 to 0.5285   | ns      | 0.5539                    |
| control vs. 4-HA 500 µM                       | -0.02895   | -0.4375 to 0.3796   | ns      | 0.8861                    |
| control vs. fluf. acid 1 µM                   | 0.03100    | -0.3775 to 0.4395   | ns      | 0.8781                    |
| control vs. fluf. acid 10 µM                  | -0.03600   | -0.4445 to 0.3725   | ns      | 0.8587                    |
| control vs. fluf. acid 20 µM                  | 0.06067    | -0.3479 to 0.4692   | ns      | 0.7642                    |

### G. GABA

| Uncorrected Fisher's LSD              | Mean Diff. | 95.00% CI of diff. | Summary | Individual P Value |
|---------------------------------------|------------|--------------------|---------|--------------------|
| rebA 750 $\mu$ M vs. GABA 0.1 $\mu$ M | 11.98      | -4.585 to 28.55    | ns      | 0.1486             |
| rebA 750 $\mu$ M vs. GABA 0.5 $\mu$ M | 16.59      | 0.02789 to 33.16   | *       | 0.0496             |
| rebA 750 $\mu$ M vs. GABA 1 $\mu$ M   | 20.61      | 4.048 to 37.18     | *       | 0.0169             |
| rebA 750 $\mu$ M vs. GABA 5 $\mu$ M   | 20.12      | 3.551 to 36.68     | *       | 0.0194             |
| rebA 750 $\mu$ M vs. GABA 10 $\mu$ M  | 12.95      | -3.619 to 29.51    | ns      | 0.1198             |
| control vs. GABA 0.1 $\mu$ M          | -1.483     | -18.05 to 15.08    | ns      | 0.8549             |
| control vs. GABA 0.5 $\mu$ M          | -0.1200    | -16.69 to 16.45    | ns      | 0.9882             |
| control vs. GABA 1 $\mu$ M            | -0.6733    | -17.24 to 15.89    | ns      | 0.9338             |
| control vs. GABA 5 $\mu$ M            | 2.327      | -14.24 to 18.89    | ns      | 0.7744             |
| control vs. GABA 10 $\mu$ M           | 1.340      | -15.23 to 17.91    | ns      | 0.8688             |

### H. 6-Methoxyflavanone

| Uncorrected Fisher's LSD         | Mean Diff. | 95.00% CI of diff. | Summary | Individual P Value |
|----------------------------------|------------|--------------------|---------|--------------------|
| vehicle vs. 6-MF 50 nM           | -15.27     | -35.21 to 4.659    | ns      | 0.1238             |
| vehicle vs. 6-MF 100 nM          | -11.51     | -31.44 to 8.425    | ns      | 0.2387             |
| vehicle vs. 6-MF 500 nM          | -12.04     | -31.97 to 7.895    | ns      | 0.2187             |
| rebA 750 $\mu$ M vs. 6-MF 50 nM  | -56.72     | -76.65 to -36.79   | ****    | <0.0001            |
| rebA 750 $\mu$ M vs. 6-MF 100 nM | -50.63     | -70.56 to -30.70   | ****    | <0.0001            |
| rebA 750 $\mu$ M vs. 6-MF 500 nM | -25.89     | -45.82 to -5.958   | *       | 0.0141             |

### I. GABA 1 $\mu$ M + increasing 6-MF (combination)

| Uncorrected Fisher's LSD                  | Mean Diff. | 95.00% CI of diff. | Summary | Individual P Value |
|-------------------------------------------|------------|--------------------|---------|--------------------|
| vehicle vs. combination 25 nM             | -10.51     | -29.64 to 8.618    | ns      | 0.2611             |
| vehicle vs. combination 50 nM             | -14.40     | -33.53 to 4.734    | ns      | 0.1302             |
| vehicle vs. combination 100 nM            | -18.04     | -37.17 to 1.088    | ns      | 0.0628             |
| rebA 750 $\mu$ M vs. combination 25 nM    | -28.69     | -47.82 to -9.562   | **      | 0.0058             |
| rebA 750 $\mu$ M + vs. combination 50 nM  | -36.74     | -55.87 to -17.61   | ***     | 0.0009             |
| rebA 750 $\mu$ M + vs. combination 100 nM | -34.37     | -53.50 to -15.24   | **      | 0.0015             |

### J. TPPO

| Uncorrected Fisher's LSD             | Mean Diff. | 95.00% CI of diff. | Summary | Individual P Value |
|--------------------------------------|------------|--------------------|---------|--------------------|
| vehicle vs. TPPO 5 $\mu$ M           | 10.74      | -8.021 to 29.50    | ns      | 0.2361             |
| vehicle vs. TPPO 50 $\mu$ M          | 7.970      | -10.79 to 26.73    | ns      | 0.3729             |
| rebA 750 $\mu$ M vs. TPPO 5 $\mu$ M  | 4.983      | -13.78 to 23.74    | ns      | 0.5735             |
| rebA 750 $\mu$ M vs. TPPO 50 $\mu$ M | 27.44      | 8.675 to 46.20     | **      | 0.0078             |

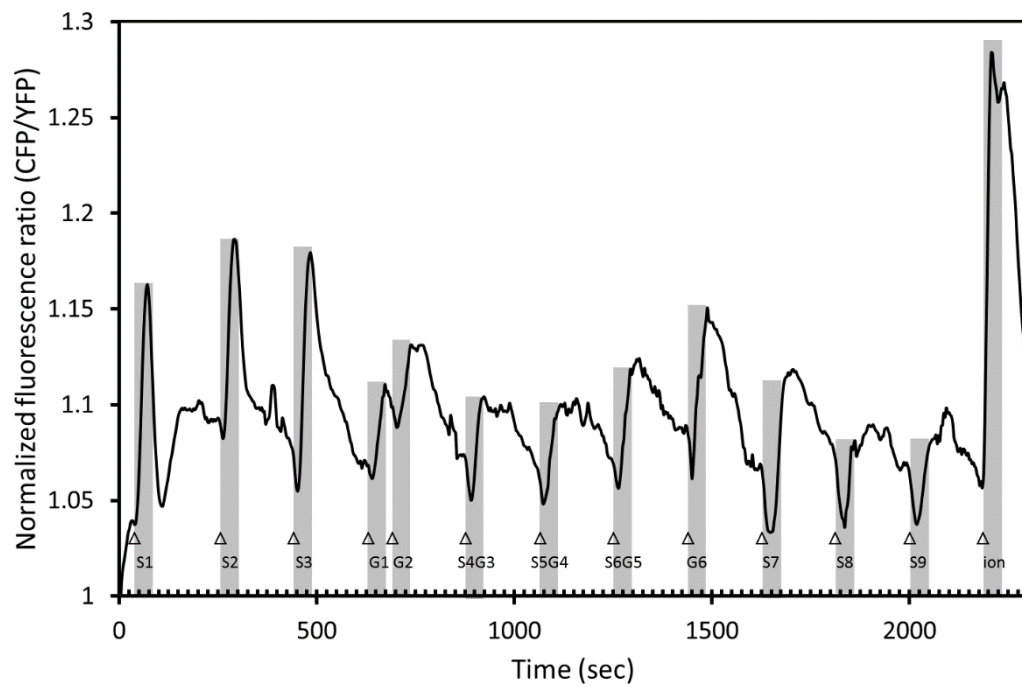

**Figure S3.** Intracellular  $[Ca^{2+}]$  changes of the injections series of Sucrose (S), Gurmarin (G) and the combinations of both. Effect of gurmarin on sucrose-induced calcium responses in STC-1 cells stably expressing the Cameleon YC3.6 calcium reporter protein. Shown are the global averages of all imaged cells (1315 ROIs). A moving average (16.25 seconds, 5 values) was used to suppress effects of high frequency calcium oscillations ( $\sim 3-6$  sec,  $\sim 0.1$  amplitude) and cell synchronization.

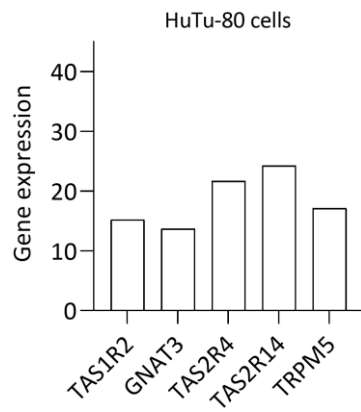

**Figure S4.** Gene expression level in unstimulated HuTu-80 cells of the TRPM5 calcium-dependent channel, together with the taste receptors for rebA TAS1R2, TAS2R4, TAS2R14, and the G protein  $\alpha$ -gustducin (GNAT3). Values are normalized intensity obtained from GSM887155.<sup>49</sup>
